# Supplementary material
Source: Springer Nature journal article supplement (https://www.springermedizin.de/resource/supplementary/13012_2013_681_MOESM1_ESM.pdf/9630232)
Supplement: MOESM1 [file 9630232]

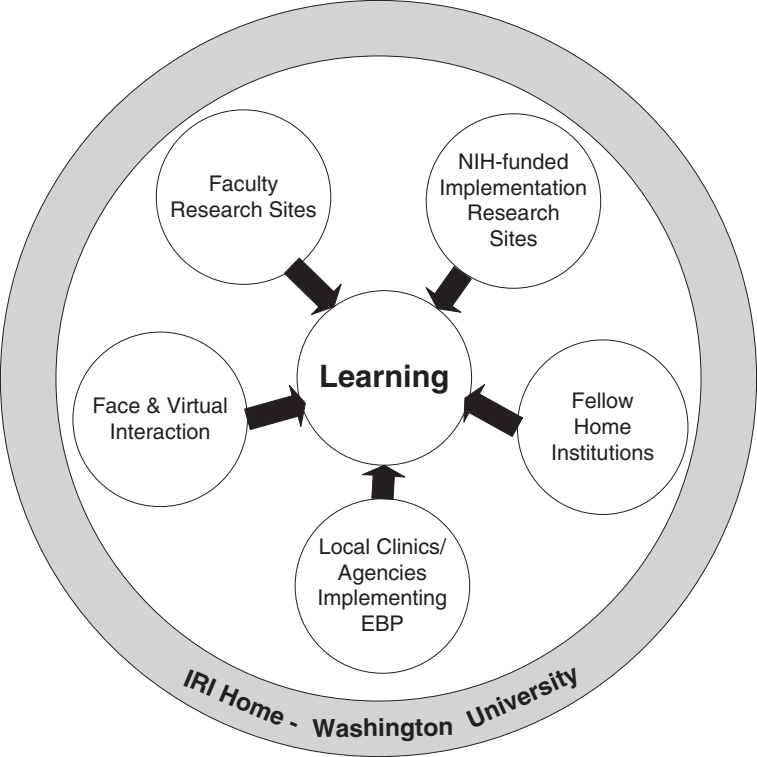

Faculty  
Research Sites

NIH-funded  
Implementation  
Research  
Sites

Face & Virtual  
Interaction

**Learning**

Fellow  
Home  
Institutions

Local Clinics/  
Agencies  
Implementing  
EBP

**IRI Home - Washington University**
